# Supplementary material for: Upgrading of diols by gas-phase dehydrogenation and dehydration reactions on bifunctional Cu-based oxides
Source: Royal Society of Chemistry journal article supplement (doi:10.1039/c4cy00639a), 2014-01-01
Supplement: c4cy00639a1.pdf [file c4cy00639a1.pdf]

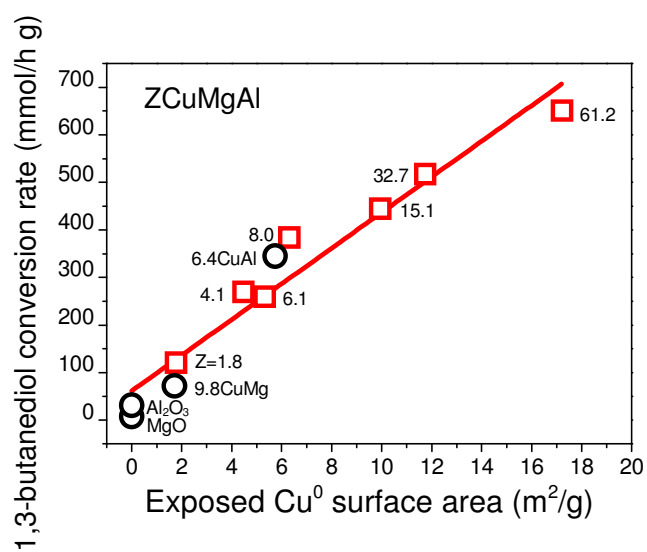

Linear relationship between the amount of exposed Cu<sup>0</sup> species and the 1,3-butanediol overall reaction rate on ZCuMgAl, 9.8CuMg, 6.4CuAl, MgO and Al<sub>2</sub>O<sub>3</sub> catalysts [ $T = 523\text{K}$ ;  $\bar{P}_{BDO} = 2.33\text{kPa}$ ]
